# Supplementary material for: Helicobacter pylori Virulence Factors and Clarithromycin Resistance-Associated Mutations in Mexican Patients
Source: MDPI journal article supplement (doi:10.3390/pathogens12020234), 2023-02-02
Supplement: s1 [file s1]

**Table S1.** Distribution of different *vacA* and *cagA* genotypes according to anatomical site and gastric disease.

| Genotype                    | Anatomic site n (%) |          | Gastric disease n(%)                       |                       |
|-----------------------------|---------------------|----------|--------------------------------------------|-----------------------|
|                             | Antrum              | Corpus   |                                            |                       |
| <i>vacA s1m1/cagA+</i>      | 9 (37.5)            |          | 5 (20.8)<br>4 (16.7)                       | CG<br>AG              |
| <i>vacA s1m1/cagA-</i>      | 2 (8.3)             | 2 (8.3)  | 3 (12.5)<br>1 (4.2)                        | AG<br>D               |
| <i>vacA s2m2/cagA-</i>      |                     | 3 (12.5) | 2 (8.3)<br>1 (4.2)                         | CG<br>D               |
| <i>vacA s1m1/s2m2/cagA+</i> | 1 (4.2)             |          | 1 (4.2)                                    | CG                    |
| <i>vacA s1m1/s2m2/cagA-</i> |                     | 1 (4.2)  | 1 (4.2)                                    | CG                    |
| <i>vacA s1m1/s1m2/cagA-</i> |                     | 2 (8.3)  | 2 (8.3)                                    | CG                    |
| <i>vacA s1/cagA+</i>        | 1 (4.2)             | 5 (20.8) | 2 (8.3)<br>2 (8.3)                         | CG<br>AG<br>D         |
| <i>vacA s1/cagA-</i>        | 2 (8.3)             | 4 (16.7) | 5 (20.8)<br>1 (4.2)                        | CG<br>AG              |
| <i>vacA m1/cagA+</i>        | 1 (4.2)             |          | 1 (4.2)                                    | D                     |
| <i>vacA m1/cagA-</i>        | 1 (4.2)             |          | 1 (4.2)                                    | AG                    |
| <i>cagA+</i>                | 1 (4.2)             | 1 (4.2)  | 1 (4.2)<br>1 (4.2)                         | AG<br>GERD            |
| <i>cagA-</i>                | 2 (8.3)             | 1 (4.2)  | 2 (8.3)<br>1 (4.2)                         | CG<br>D               |
| <i>Hp (-)</i>               | 4 (16.6)            | 5 (20.8) | 4 (16.7)<br>3 (12.5)<br>1 (4.2)<br>1 (4.2) | CG<br>AG<br>D<br>GERD |
